# Supplementary material for: Surface Modification by Amino Group Inducing for Highly Efficient Catalytic Oxidation of Toluene over a Pd/KIT-6 Catalyst
Source: PubMed Central journal article supplement — ACS Omega. 2022 Oct 27;7(44):39950–8. doi: 10.1021/acsomega.2c04331 (PMC9648143; doi:10.1021/acsomega.2c04331), 2022-10-27
Supplement: ao2c04331_si_001.pdf [file ao2c04331_si_001.pdf]

## Supporting information

Catalyst Characterizations and Other Experimental Data

### Surface modification by amino group inducing for highly efficient catalytic oxidation of toluene over a Pd/KIT-6 catalyst

Jinglei Cui<sup>1\*</sup>, Dan Ren<sup>1</sup>, Jingjing Tan<sup>2</sup>, Huirong Zhang<sup>1</sup>, Yanxia Guo<sup>1\*</sup>, Long Huang<sup>3\*</sup>

<sup>1</sup>Yellow River Laboratory of Shanxi Province, Institute of Resources and Environmental Engineering, Shanxi University, Taiyuan 030006, PR China

<sup>2</sup>Engineering Research Center of Ministry of Education for Fine Chemicals, Shanxi University, Taiyuan 030006, PR China

<sup>3</sup>Beijing Key Laboratory of Fuels Cleaning and Advanced Catalytic Emission Reduction Technology, Beijing Institute of Petrochemical Technology, Beijing 102617, China

E-mail: cuijl@sxu.edu.cn; guoyx@sxu.edu.cn; huangl@bipt.edu.cn

### Table of contents

|                                     |   |
|-------------------------------------|---|
| 1. Catalyst Characterizations.....  | 2 |
| 2. Other Experimental Figures ..... | 4 |
| 3. Other Experimental Tables.....   | 6 |

## 1. Catalyst Characterizations

---

X-Ray Diffraction (XRD) characterization (Bruker AXS, D2 PHASER) was performed to characterize the crystal plane structure of the supports and the phase composition of the catalysts. Test conditions: Cu target ray,  $\lambda = 0.15418$  nm at 40 kV and 40 mA, with a scanning rate from  $0.5\sim 10^\circ$  and from  $10^\circ$  to  $80^\circ$ .

The absorption-desorption curve and pore size distribution of samples were measured by ASAP 2460 N<sub>2</sub> physical desorption and desorption apparatus (Micromeritics, ASAP 2460). 150 mg samples were degassed at  $300^\circ\text{C}$  to remove surface impurities and water. After cooling, N<sub>2</sub> desorption and desorption tests were performed by adding liquid nitrogen. The specific surface area was calculated by Brunauer-Emmett-Teller (BET) formula, and the pore size distribution was obtained by Barrett-Joyber-Halenda (BJH) model.

The morphology of samples was observed by Japanese JEM-2100 transmission electron microscope. The samples were dried at  $60^\circ\text{C}$  for 3 h in a vacuum drying oven before testing. The test conditions were LaB<sub>6</sub> (lanthanum hexaboride) electron gun, with point resolution of 0.23 nm and line resolution of 0.14 nm, and the acceleration voltage of 200 kV.

The surface morphology of samples was observed by TEM-IT500HR scanning electron microscope. Before the test, the samples were placed in a vacuum drying oven at  $60^\circ\text{C}$  for 6 h. The 0.5% IM catalyst and 0.5% GR catalyst were reduced for 2 h in H<sub>2</sub>/Ar atmosphere at  $300^\circ\text{C}$  and  $500^\circ\text{C}$ , respectively. The sample powder was dispersed and adhered to the conductive adhesive in advance, and the observation was performed after spraying gold for 30 seconds.

The FTIR spectra were recorded by a Thermo Scientific Nicolet iS50 FTIR spectrometer. The samples were dried in a vacuum drying oven at  $60^\circ\text{C}$  for 6 h before testing, and the test wavelength ranged from 400 to  $4000\text{ cm}^{-1}$ .

*In-situ* X-ray photoelectron spectrometer (ThermoFischer, ESCALAB 250Xi) was used to test the catalysts. The catalysts prepared by impregnation method and immobilization method were reduced *in-situ* for 2 h in H<sub>2</sub>/Ar atmosphere at  $300^\circ\text{C}$  and  $500^\circ\text{C}$  respectively. Test conditions: vacuum of the analysis room was  $8\times 10^{-10}$  Pa, the

excitation source was Al Ka ray ( $h\nu=1486.6$  eV), the working voltage was 12.5 kV, the filament current was 16 mA, and the signal was accumulated for about 2-10 cycles, Passing-Energy was 30 eV, step length was 0.1 eV.

The O<sub>2</sub>-TPD was performed in a Tianjin Xianquan automatic chemical adsorption instrument. Before the test, 0.5% IM or 0.5% GR catalyst (50 mg) was reduced *in-situ* for 2 h in H<sub>2</sub>/Ar atmosphere at 300°C and 500°C respectively. In the test, the sample was heated from room temperature to 500°C in a 5% O<sub>2</sub>/He flow and maintained for 30 min. After cooling to room temperature, the sample was heated to 800°C (10°C/min) in a He flow. The desorption amount of oxygen was detected by a TCD detector.

The amount of CO chemisorption of the catalyst was measured by a gas chromatogram (GC 920, China) equipped with a TCD detector using dynamic pulse method. Prior to the measurement, 50 mg sample was reduced by 10% H<sub>2</sub>/Ar (40 ml min<sup>-1</sup>) at 300°C or 500°C for 2 h and then the gas was switched to Ar (40 ml min<sup>-1</sup>) at the same temperature for 1 h. Pulses of 5% CO/N<sub>2</sub> were introduced to the sample until uptake saturation. The Pd dispersion was calculated by the following equation:

$$Dispersion = \frac{MV}{vm} \times 100\%$$

Where  $M$  is the atomic weight of Pd (106.42 g mol<sup>-1</sup>),  $V$  is the amount of CO adsorbed (mol),  $v$  is the adsorption stoichiometry (1 mol CO per surface atom of Pd), and  $m$  is the amount of Pd (g).

The turnover frequency (TOF) of the catalysts for toluene oxidation was determined in separate experiments. The TOF was calculated as following:

$$TOF = \frac{Cx\%}{n}$$

Where  $C$  is the toluene passed through the catalyst per hour (mol),  $x\%$  is the conversion of toluene,  $n$  is the number of surface Pd active site of the catalyst determined by ICP and CO chemisorption.

## 2. Other Figures

---

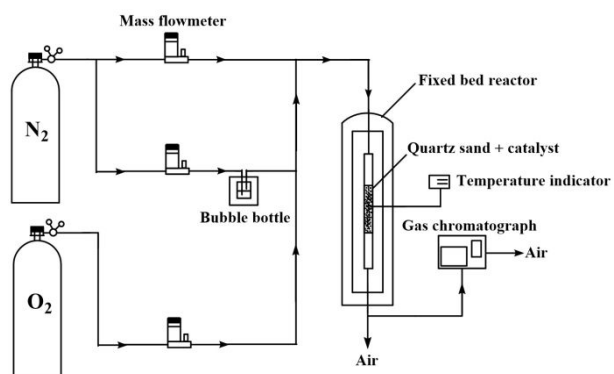

**Figure S1** Diagram of catalyst activity evaluation device

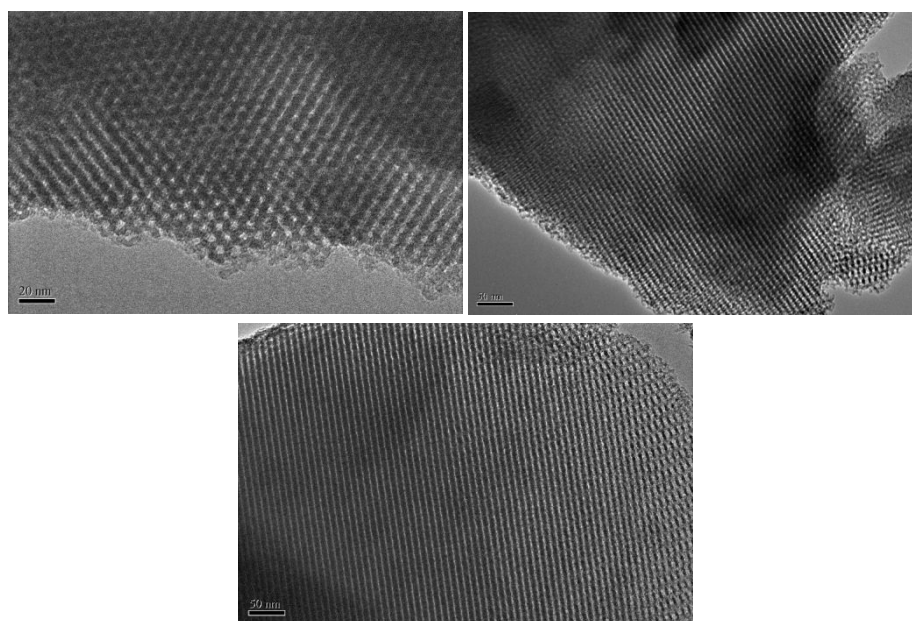

**Figure S2** TEM images of KIT-6

## 2. Other Figures

---

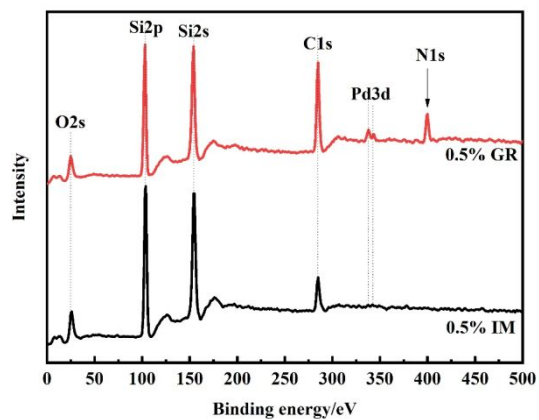

**Figure S3** XPS spectra of 0.5% IM catalyst and 0.5% GR catalyst

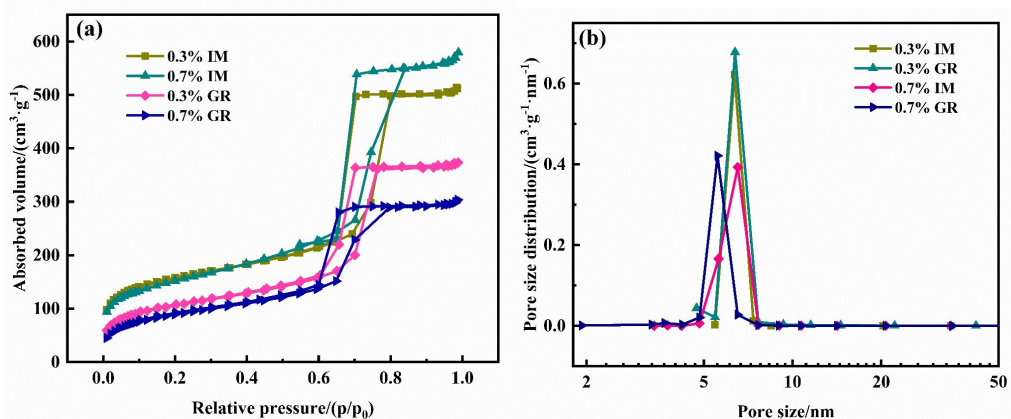

**Figure S4** N<sub>2</sub> adsorption/desorption isotherms (a) and pore size distributions (b) of the catalysts

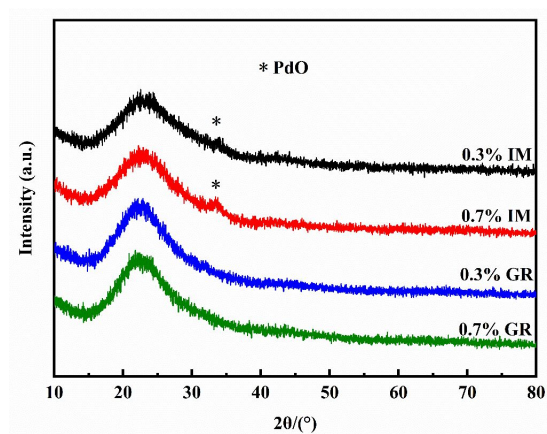

**Figure S5** XRD pattern of catalysts

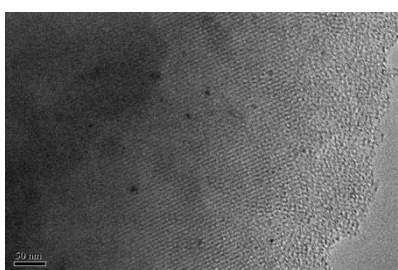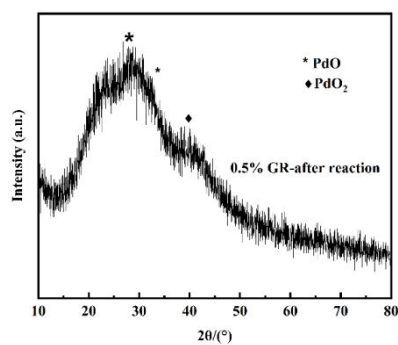

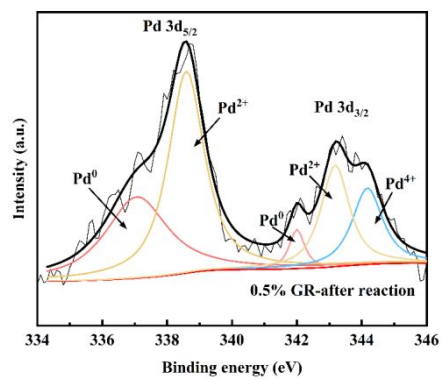

**Figure S6** TEM image, XRD pattern and XPS spectrum of 0.5% GR catalyst after reaction

### 3. Other Tables

**Table S1** O<sub>2</sub>-TPD and TOF data of the catalysts

| catalyst | Total amount of adsorbed oxygen ( $\mu\text{mol g}^{-1}$ ) | O <sub>2</sub> <sup>-</sup> <sub>ad</sub> ( $\mu\text{mol g}^{-1}$ ) | O <sup>-</sup> <sub>ad</sub> ( $\mu\text{mol g}^{-1}$ ) | O <sup>2-</sup> <sub>lat</sub> ( $\mu\text{mol g}^{-1}$ ) | TOF (h <sup>-1</sup> ) |
|----------|------------------------------------------------------------|----------------------------------------------------------------------|---------------------------------------------------------|-----------------------------------------------------------|------------------------|
| 0.5% IM  | 50.5                                                       | 14.6                                                                 | 26.9                                                    | 9.0                                                       | 4.6                    |
| 0.5% GR  | 62.6                                                       | 21.0                                                                 | 37.4                                                    | 4.2                                                       | 9.7                    |

**Table S2** Catalytic oxidation performance of toluene with different catalysts

| Samples | T <sub>10</sub> (°C) | T <sub>50</sub> (°C) | T <sub>75</sub> (°C) | T <sub>90</sub> (°C) |
|---------|----------------------|----------------------|----------------------|----------------------|
| 0.3% IM | 155                  | 180                  | 183                  | 185                  |
| 0.3% GR | 150                  | 175                  | 178                  | 182                  |
| 0.5% IM | 159                  | 175                  | 179                  | 182                  |
| 0.5% GR | 145                  | 162                  | 166                  | 171                  |
| 0.7% IM | 159                  | 168                  | 170                  | 171                  |
| 0.7% GR | 147                  | 158                  | 162                  | 165                  |

**Table S3** Catalytic performance of 0.5% GR at different WHSV

| Catalyst | WHSV (mL·g <sup>-1</sup> ·h <sup>-1</sup> ) | T <sub>50</sub> (°C) | T <sub>90</sub> (°C) |
|----------|---------------------------------------------|----------------------|----------------------|
| 0.5% GR  | 10800                                       | 156                  | 168                  |
|          | 24000                                       | 162                  | 171                  |
|          | 32100                                       | 181                  | 200                  |
